# Supplementary material
Source: Research Square preprint supplement (doi:10.21203/rs.3.rs-9077877/v1)
Supplement: Supplementary file 2 [file 8bf5132d3a47910cef46f26a.xlsx]

## Sheet: Table S1
Table S1 – Evaluation criteria for leaf wilting degree
Score	Phenotypic description
1	Leaves show no rolling, with leaf tip drying less than 1 cm
2	Leaves are rolled and wilted, with dried length < 1/3 of the leaf
3	Leaves are rolled and wilted, with dried length between 1/3 and 2/3 of the leaf
4	Leaves are severely rolled and wilted, with dried length > 2/3 of the leaf, accompanied by seedling death
5	Most seedlings are severely wilted or dead

## Sheet: Table S2
Table S2 – Phenotypic data for five drought-related traits in 283 rice accessions.
Accession ID	Accession	LSRI	LW	DPH	DRL	CDTM	PH-CK (cm)	PH-TR (cm)	RL-CK (cm)	RL-TR (cm)
P001	Chenghui 448	0.86	2	0.2	0.34	0.5	33.2333	21.7667	4.73333	5.93333
P003	Minghui 63	0.98	2	0.29	0.74	0.67	36.5333	28.63	6.24113	8.32
P004	Chorofa	0.77	2	0.36	0.58	0.6	31.6667	26.6	11.0596	12.79
P005	D11	0.96	1	0.4	0.43	0.65	26.1	19.5333	10.1667	14.0667
P006	D15	0.68	3	0.32	0.44	0.47	27.4667	22.33	6.4105	6.38
P007	KR200	0.3	5	0.33	0.65	0.35	35.8	25.5333	6.9	11.8
P008	829	0.74	3	0.36	0.72	0.58	34.1333	28.83	12.6093	16.55
P009	MERLE	0.94	1	0.37	0.82	0.77	36.7	31.3	9.7555	13.93
P010	RR 272-17-829	0.73	2	0.34	0.63	0.61	23.5667	19.47	10.9157	13.26
P011	K 479-2-3	0.71	2	0.16	0.62	0.56	41.2	27.87	12.2452	14.73
P012	Zaoxian 14	0.75	2	0.4	0.44	0.56	29.7	26.13	9.73007	9.7
P013	IRGA 959-1-2-2F-4-1-4A-6-CA-6X	0.79	2	0.33	0.36	0.52	32.2	26.23	12.169	10.92
P014	IR65600-27-1-2-2	0.81	1	0.37	0.39	0.61	32.9667	28	14.4215	13.46
P015	Zhongjian 100	0.7	2	0.42	0.57	0.6	23.4667	20.97	9.01027	10.26
P016	E 2040	0.78	2	0.48	0.55	0.62	25.2667	23.9	12.7871	14.33
P017	Guangluai 4	0.78	2	0.18	0.45	0.52	33.3667	23.2	18.7065	18.83
P018	Zhongyouzao 81	0.8	1	0.35	0.83	0.75	30.2667	25.33	11.1782	16.15
P019	E Zi 96	0.81	3	0.43	0.22	0.45	29.7333	22.6667	18.2667	19.9333
P020	IRGA 370-38-1-1F-C4-2	0.95	3	0.09	0.15	0.36	37.7	22.7333	12.3	12.1667
P022	IR 2344-P1 PB-9-3-2B	0.93	2	0	0.37	0.47	44.4667	24.9667	10.0333	13
P026	MONOLAYA	0.77	3	0.2	0.54	0.49	30.5333	21.73	11.9064	13.22
P027	OM997	0.86	2	0.46	0.75	0.7	25.9	24	6.94403	9.38
P028	LALSAITA	0.94	1	0.22	0.46	0.62	44.6333	32.6	9.55227	9.65
P030	DANAU LAUT TAWAR	0.7	3	0.34	0.32	0.44	32.8	27.23	15.3361	13.12
P031	IR 57920-AC-25-2-B	0.93	3	0.31	0.56	0.55	32.2	22.7667	6.03333	9.53333
P032	WAS 173-B-B-6-2-2	0.27	4	0.85	0.46	0.47	24	22.9333	8.3	11.9
P033	ARAURE 1	0.31	4	0.41	0.19	0.28	34.7	26.1333	10.6333	11.1
P034	AMISTAD 82	0.34	4	0.2	0.1	0.2	25.0333	16.4333	9.66667	8.76667
P035	ICTA CRISPO 38	0.87	2	0.55	0.6	0.67	29.5	29.43	11.6355	13.7
P036	IR 75870-5-8-5-B-1	0.8	2	0.35	0.92	0.72	32.3	27.07	8.66307	13.41
P037	IR77298-14-1-2	0.47	3	0.18	0.35	0.37	43.1	30.07	12.1605	10.77
P038	Bala	0.24	5	0.84	0.45	0.4	25.8	24.55	11.1	15.8
P039	IR55419-04	0.84	1	0.36	0.77	0.74	32.6333	27.6	9.89943	13.55
P040	Matatag 2	0.69	3	0.45	0.3	0.45	35.6667	27.4667	10.1	12.1333
P042	UNNAMED	0.87	2	0.29	0.33	0.52	32.9667	22.9	8.53333	10.6667
P043	Ajaya	0.76	1	0.35	0.68	0.69	24.9667	20.8	10.6447	13.44
P044	P59279	0.95	1	0.18	0.53	0.63	36.2667	25.13	13.8964	15.23
P045	Guang 122	0.83	2	0.36	0.33	0.53	26.9333	22.6	9.5607	8.25
P046	IRAT 144	0.83	2	0.4	0.46	0.58	23.7333	20.7	16.5386	16.83
P047	93072	0.9	1	0.09	0.37	0.55	36.3667	22.43	17.9782	16.35
P048	Maravilha	0.87	1	0.24	0.43	0.6	46.2667	34.4	17.4532	17.14
P049	BG304	0.75	2	0.4	0.54	0.59	30.4667	26.73	11.8725	13.14
P050	YZX1	0.64	2	0.37	0.3	0.49	31.8667	27.13	14.0151	11.69
P052	TKM 9	0.75	1	0.31	0.35	0.57	24.9333	19.97	14.7687	13.13
P054	Ya Nong Zao 4	0.85	1	0.42	0.39	0.62	31.9333	28.53	13.8034	12.86
P056	BD007	0.39	4	0.29	0.11	0.24	30.7333	24	12.3299	7.58
P057	E 2024	0.81	2	0.44	0.22	0.51	27.2333	24.73	12.0673	8.95
P058	GLADIO	0.5	4	0.65	0.21	0.38	36.2667	31.2667	12.5333	13.4667
P060	Y134	0.74	2	1	0.39	0.69	14.6667	20.13	11.9403	11.1
P061	Amol 3 (Sana)	0.58	3	0.32	0.36	0.43	29.5333	23.97	11.7201	10.61
P062	Bg 300	0.56	3	0.38	0.55	0.5	28.0667	24.03	8.38363	9.42
P063	BEGMI 135	0.46	4	0.22	0.37	0.32	45.9667	33.4	10.4076	9.46
P064	YZX2	0.81	2	0.24	0.37	0.51	41.3667	30.77	11.229	10.28
P065	IR64a	0.81	2	0.48	0.25	0.53	35.3333	27.7333	8	9
P066	CALIFORNIA BELLE	0.44	3	0.5	0.45	0.47	37	29.3667	7.4	10.5333
P067	WAS 206-B-B-2-2-1	0.84	3	0.38	0.65	0.58	32.3333	23.8333	5.33333	9.06667
P068	WAS 198-B-3-1-3	0.79	2	0.25	0.94	0.7	34.2	25.8	5.33503	8.35
P069	IR 56	0.63	3	0.4	0.47	0.49	28	24.6	10.3906	10.63
P070	NX 3533	0.83	2	0.25	0.47	0.55	34	25.5	10.3821	10.63
P071	Bg 94-1	0.84	2	0.31	0.85	0.69	27.9667	22.5	7.1303	10.41
P072	IR8192-200-3-3-1-1	0.71	3	0.84	0.24	0.53	26.9667	25.6667	13.4667	14.9333
P074	Y075	0.92	2	0.34	0.42	0.57	29.9333	24.77	12.7956	12.41
P075	NERICA-L-27	0.9	2	0.22	0.45	0.55	34.6	25.2	8.51907	8.54
P076	Molizhanzhan	0.94	1	0.3	0.5	0.65	31.0667	24.73	11.4153	12.1
P077	Wanxian 763	0.94	1	0.23	0.35	0.58	42.4	31.07	8.2312	7.34
P078	CT 6510-24-1-2	0.79	2	0.18	0.52	0.54	41.0333	28.57	10.6447	11.59
P079	SONA (IET 1991)	0.9	2	0.44	0.58	0.65	27.8667	25.3	12.7363	14.74
P080	Fengaizhan	0.78	2	0.38	0.53	0.59	27.8667	24	11.2713	12.3
P081	Yuexiangzhan	0.58	3	0.45	0.46	0.49	27.2667	24.9	11.1104	11.3
P082	Hnankar	0.88	2	0.28	0.51	0.58	39.6667	30.8	8.53603	9.2
P083	IR68552-55-3-2	0.72	2	0.36	0.49	0.56	36.8333	31.17	10.7293	11.3
P084	OM1706	0.81	2	0.28	0.39	0.53	38.9333	30.3	12.0843	11.36
P085	IRBB7	0.81	2	0.3	0.62	0.61	34.2333	27.13	7.7146	9.21
P086	IR64-IL	0.89	3	0.43	0.78	0.64	33.7667	25.6333	5.4	10.2
P087	IR68897B	0.74	2	0.34	0.64	0.61	29.5	21.2	6.16667	10.4667
P089	NERICA-L-1	0.89	1	0.48	0.42	0.66	31.6333	24.8667	6.53333	8.96667
P090	Huhan 15	0.37	4	0.61	1	0.61	28.9	30.4	9.38287	15.34
P091	Giza 14	0.86	2	0	0.03	0.34	41.8	22.77	19.0706	9.87
P092	B6136-3-TB-0-1-5	0.94	2	0.65	0.38	0.63	27.1667	23.5	8.16667	10.7
P093	UPL RI-7	0.75	3	0.25	0.49	0.48	38.3	28.73	10.2128	10.74
P094	B 6144-MR-6-0-0	0.84	3	0.51	0.21	0.46	35.9333	28.6	13.8667	14.8333
P095	GIZA 178	0.57	3	0.63	0.47	0.53	19.8667	21.17	9.84867	10.08
P096	SAMBALA MALO	0.94	1	0.19	0.56	0.64	47.7	33.63	8.85783	10.02
P097	WAS 199-B-1-2-1	0.33	4	0.72	0.23	0.37	29.9667	26.7667	12.9667	14.2
P098	IRI 339	0.76	3	0.36	0.33	0.45	41.4	30.1333	10.1	12.6
P099	IR 57514-PMI 5-B-1-2	0.91	1	0.2	0.43	0.6	37.0333	26.27	11.1189	10.94
P100	Jiangxi Simiao	0.83	3	0.49	0.27	0.48	42.9667	33.9667	12.5333	14.5333
P101	X21	0.87	2	0.31	0.31	0.52	39.5	27.9	10.3667	12.6
P102	C70	0.84	2	0.29	0.53	0.58	29.1667	22.97	12.1774	13.35
P103	LX2007	0.91	2	0.15	0.63	0.59	34.4	23.1	9.78087	11.8
P104	MAYBELLE	0.32	4	0.26	0.22	0.25	35.8	27.33	13.9727	10.32
P109	R644	0.82	2	0.39	0.37	0.55	25.9667	22.63	11.7794	10.8
P110	BW311-9	0.8	3	0.56	0.09	0.43	29.8333	24.4667	11	9.8
P111	Carijo	0.93	1	0.49	0.36	0.65	33.8667	26.7333	7.43333	9.56667
P113	Ganwanxian 37 (926)	0.92	1	0.28	0.61	0.68	35.9667	27.87	12.0842	14.36
P114	Huangsizhan	0.81	2	0.46	0.72	0.68	26	24.17	10.0095	13.16
P115	IR 2003-P7-7-4-2	0.66	3	0.48	0.15	0.4	33.8667	26.5	15.8667	15.5333
P116	Sanhuangzhan No. 2	0.68	3	0.6	0.1	0.42	25.0333	21.0667	11.9333	10.9
P117	IR 80310-12-B-1-3-B	0.69	2	0.27	0.41	0.51	33.5	25.67	11.339	10.91
P119	Govind	0.7	3	0.51	0.27	0.46	31.5	30.43	10.5346	8.43
P120	NSIC RC9 (APO)	0.74	2	0.17	0.51	0.52	34.3667	23.5	12.4738	13.37
P121	Hua 565	0.84	2	0.42	0.47	0.59	22	19.7	10.9326	11.24
P124	PT60	0.86	2	0.45	0.7	0.68	29.2	26.8	8.98483	11.57
P125	KinandangPatong	0.79	3	0.41	0.45	0.51	39.6667	35.17	11.6778	11.75
P126	BR11	0.66	3	0.33	0.42	0.46	29.7667	24.23	13.4308	12.95
P127	Huajingxian 74	0.82	2	0.38	0.7	0.66	24.2667	20.8	10.0857	13.07
P128	IR66897B	0.9	2	0.45	0.38	0.58	28	25.8	10.4414	9.7
P129	IR58025B	0.52	3	0.5	0.23	0.41	30.8	24.4	12.3	13.6
P130	Chhomrong	1	1	0.42	0.7	0.76	34.4333	30.8	10.0095	12.86
P131	Palung 2	0.96	2	0.32	0.5	0.6	34.4667	27.8	10.3398	11.01
P132	Qb_604	0.68	2	0.56	0.33	0.55	16.8667	17.03	11.1782	9.7
P133	FL478	0.94	2	0.47	0.44	0.61	35.8333	33.4	8.56993	8.49
P134	IR68	0.95	1	0.31	0.62	0.69	39.6333	31.87	9.92483	11.9
P135	SAGC-4	0.71	2	0.64	0.55	0.65	21.2667	22.9	13.219	14.78
P136	Zhonghua 1	0.96	1	0.45	0.67	0.75	22.4	20.57	10.5769	13.28
P137	KCD1	0.33	4	0.53	0.52	0.42	24.4667	24.03	12.694	13.75
P139	CYPRESS	0.63	3	0.77	0.23	0.5	24.7333	22.7333	11.0333	12.1333
P140	Shwe Thwe Yin HYV	0.88	2	0.45	0.7	0.68	34.2667	31.37	8.79857	11.38
P141	PSBRC88	0.66	2	0.38	0.45	0.54	25.3	21.73	8.22273	8.27
P144	X23	0.47	4	0.46	0.73	0.5	26.2	24.23	9.9079	13.08
P145	C71	0.97	1	0.39	1	0.84	39.3	29.1333	4.9	10.8333
P146	IRBB62	0.92	1	0.34	0.26	0.57	33.2667	27.5	9.8063	7.69
P148	Jinkouzhuixing material	0.57	3	0.39	0.17	0.38	33.1333	28.87	15.3446	10.48
P152	PATISAIL	0.76	3	0.47	0.6	0.57	40.2	31.3667	6.16667	10.0333
P154	At354	0.58	3	0.5	0.33	0.46	42.1333	33.4	15.3	19.0667
P155	IR74	0.69	3	0.56	0.2	0.45	36.4667	30.0333	19.6667	20.7
P156	1088	0.73	3	0.36	0.42	0.48	38.4	32.5	5.80077	5.61
P158	E 2070	0.68	2	0.38	0.31	0.5	34.6667	25.6	14.1167	17.233
P159	Erjiunan 1	0.77	2	0.4	0.12	0.45	33.5333	25.0333	12.5501	11.7879
P160	Lai Nok Kha	0.71	3	0.48	0.07	0.39	24.7333	19.3667	18.5333	16.1333
P161	Xiangchangzao	0.51	3	0.49	0.3	0.43	42.4667	33.5333	13.8	16.6667
P163	Aijiaonante	0.75	1	0.45	0.09	0.51	30.4	23.4333	18.5667	16.5667
P164	Liuliyou	0.56	3	0.49	0.15	0.39	40.9	32.3	10.4333	10.3
P165	Rongdao 4	0.49	3	0.58	0.11	0.39	35.2333	29.3	13.7102	12.7333
P166	Luoaizao 3	0.54	3	0.34	0.15	0.35	35.0333	25.1333	16.293	16.0051
P167	M 6034-1	0.99	1	0.41	0.46	0.67	34.0667	25.5333	16.293	23.3
P168	KWANG-LU-AI 4	0.24	5	0.59	0.14	0.24	34.0333	28.4667	15.3022	14.8364
P170	Guangluai 4	0.73	2	0.51	0.17	0.49	26.9	21.4333	16.2591	16.4878
P171	Jinnante B	0.63	3	0.33	0.15	0.36	34.6667	24.7667	14.0066	13.8288
P172	Sanbaili	0.85	2	0.36	0.68	0.65	47.6667	34.8	9.3	16.3
P173	Huoqing	0.82	2	0.38	0.23	0.5	33.2667	24.4667	14.2667	15.6667
P174	L 301B	0.9	3	0.47	0.18	0.46	35.2	27.4333	18.2667	18.8667
P175	SXC216	0.61	3	0.9	0.07	0.47	26.2	25.7	13.9667	12.1
P176	Vietnam Early Rice	0.76	3	0.62	0.25	0.49	26.4	22.3667	15.3333	17.2667
P179	Jiangnongzao 1B	0.96	1	0.52	0.9	0.84	27.8667	22.4333	7.63333	15.8
P180	Anfuzhan	0.78	4	0.54	0.26	0.42	48.2333	39.2333	18.3667	20.9
P181	Zhuzhen B	0.88	2	0.32	0.15	0.47	35.8667	25.5	23.6	23.2667
P182	Zaoxian 240	0.79	3	0.39	0.2	0.42	28	20.8333	16.1	16.9
P183	Baoxie-7B	0.73	3	0.36	0.39	0.47	35.5667	25.9333	16.2	21.4667
P184	Longge 33	0.86	2	0.37	0.42	0.57	32.8667	24.0667	16.4	22.6333
P185	G Zhenshan 97B	0.58	3	0.48	0.17	0.4	38.3	30	18.7667	18.9333
P186	KANGRI	0.74	3	0.39	0.11	0.39	38.0333	28.2333	18.1333	16.8667
P198	N'YA NOFF	0.56	3	0.86	0.28	0.53	25.9	24.9	16.1333	18.9333
P199	Hongyangzao 3	0.71	2	0.4	0.25	0.49	30.2333	22.5667	13.2667	14.9667
P200	Dongtingwanxian	0.36	4	0.96	0.15	0.41	31.8	32.0333	10.4333	10.2667
P205	Chenwan 3	0.68	2	0.42	0.16	0.46	36.0667	27.2	20.2333	20.3333
P206	Xiangwanxian 1	0.62	3	0.11	0.23	0.33	39.8	24.4333	16.5	18.0333
P207	KAMULI	0.31	5	0.54	0.14	0.23	30.6667	24.8333	12.4333	12.1333
P208	CN44-40-7	0.26	4	0.26	0.49	0.34	35.1333	24	9.73333	14.3667
P211	KABERI	0.5	3	0.62	0.15	0.41	32.8	27.8	18.0667	17.8667
P212	Sri Lanka 1	0.51	3	0.27	0.24	0.36	44.0333	30.2	10.5333	11.8
P213	Liangguang	0.43	3	0.32	0.24	0.35	46.9333	33.2667	16.0333	17.8333
P214	Shuangbaiai 2	0.4	3	0.46	0.38	0.43	36.9	28.6333	14	18.3667
P215	SUNAR	0.58	3	0.55	0.19	0.42	28.6	23.3	13.5667	14.1
P216	W 398	0.78	3	0.26	0.28	0.42	27.1333	18.5333	12.0333	14.1333
P217	Nante	0.88	2	0.27	0.31	0.51	32.8667	22.6333	16.6	20.2
P218	Daguai 7	0.76	1	0.46	0.17	0.55	31.9	24.7333	13.6333	13.7333
P219	Jiangerzao	0.39	3	0.4	0.27	0.38	36.4333	27.1333	15.6667	18.2333
P220	PJ110	0.5	3	0.4	0.49	0.47	38.9667	29.1667	8.1	11.9333
P221	Guangxuanliuhao	0.61	3	0.37	0.5	0.49	33.3333	24.4333	10.8333	16.1333
P222	Zuihou	0.51	3	0.54	0.14	0.39	48.4333	39.3	16.8	16.2
P223	IR 77298-14-1-2-10	0.61	3	0.46	0.3	0.44	38.8333	30.0667	8.2	9.9
P226	531	0.31	3	0.49	0.18	0.35	39.3	30.9667	17.2667	17.7
P227	FACAGRO 406	0.53	4	0.36	0.38	0.37	38.9667	28.4	9.7	12.8333
P228	Qunxuanzao	0.68	2	0.61	0.42	0.59	32.3667	27.4	14.3667	19.6667
P229	IRAT 10	0.6	3	0.5	0.37	0.47	38.4333	30.5667	11.8667	15.3667
P230	Guangluai 15-1	0.73	3	0.39	0.4	0.48	35	26	13.4667	18.1667
P231	Mamagu	0.58	3	0.39	0.21	0.39	44.7	33.2333	18.3	19.5667
P232	ARC 11777	0.67	3	0.47	0.33	0.47	35.2	27.5	13.4667	16.8333
P233	Fanwu	0.48	3	0.21	0.19	0.32	38.4667	25.4333	17.9333	18.6667
P234	E Zi 110	0.45	3	0.53	0.22	0.4	36.9	29.8667	18.3333	19.8
P235	Xiaohonggu	0.58	3	0.3	0.36	0.42	36.9667	25.8667	11.6	14.9
P236	Dangyu 5	0.75	2	0.58	0.91	0.76	29.2333	24.2667	6.4	13.3
P237	78 Xuanwu	0.75	3	0.4	0.38	0.48	38.6	28.9	10.6667	14.0333
P238	KUNJUKUNJU	0.71	3	1	0.27	0.58	18.3667	18.8333	13.9	16.1667
P239	PERUBAK LUEY	0.68	3	0.37	0.26	0.42	32.4667	23.8333	10.9333	12.5333
P240	RP20-12	0.35	4	0.51	0.23	0.32	30.3	24.1333	12.8667	14.1333
P241	GZ 1368-5-4	0.56	3	0.43	0.24	0.41	27.4333	20.8667	13.1	14.5667
P242	Aitougu 151	0.63	3	0.7	0.22	0.48	28.8333	25.6	19.9	21.7
P243	Momi	0.56	3	0.56	0.21	0.43	48.2333	39.6	21.8	23.2333
P244	E Zi 100	0.93	2	0.42	0.23	0.53	26	19.6667	11.3667	12.5
P245	Cungunuo	0.76	2	0.37	0.2	0.47	36.1333	26.5667	16.3333	17.2
P247	NCS349	0.55	3	0.17	0.2	0.33	48.5	31.1	15.7333	16.6667
P248	Qingtaiai	0.64	3	0.49	0.5	0.52	36.6	28.8667	7.73333	11.5
P249	PL 3165	0.49	3	0.3	0.22	0.35	43.4667	30.5333	12.5333	13.5333
P250	Heidu 4	0.54	3	0.5	0.18	0.4	31.4333	24.9333	18.2333	18.7667
P252	Xugunuo	0.84	1	0.72	0.3	0.67	33.0667	29.6	16.3	19.5
P254	IR 3839-1	0.67	3	0.34	0.31	0.43	30.5667	21.9667	8.36667	10.1333
P255	RATNAGIRI 45-2	0.5	3	0.41	0.43	0.46	29.7333	22.4	10.2	14.2333
P256	PORONG	0.62	3	0.52	0.11	0.4	36.2	29.0667	13.0333	12.1333
P257	TAICHUNG SEN-YU 214	0.82	2	0.56	0.29	0.56	36.2667	29.7667	15.7	18.5667
P258	B 737G-KN-23-1	0.67	2	0.83	0.15	0.55	31.4667	29.8333	11.7333	11.4667
P259	IR 73571-3B-11-3-K2	0.69	2	0.49	0.06	0.44	38.1	29.9667	12.9667	11.1667
P261	Youzhan	0.73	2	0.32	0.16	0.44	38.9667	27.6	15.9667	16
P262	Chengduai 3	0.81	1	0.5	0.38	0.64	32.9	26.1	15.4667	20.4
P263	88B	0.91	2	0.31	0.36	0.54	36.8667	25.9667	10.2333	13.1667
P264	Nanjing 11	0.93	1	0.48	0.12	0.56	30.2	23.7333	21.6333	20.2333
P265	Zhenxian 232	0.95	1	0.44	0.36	0.64	32.5667	24.9667	14.5333	18.6333
P266	Liusha 1	0.76	2	0.56	0.19	0.52	34.2333	28.1333	20.7333	21.7
P267	ARC 6579	0.71	3	0.41	0.22	0.42	36.4667	27.4	12.0333	13
P269	Hongwan 1	0.42	3	0.26	0.17	0.32	30.2	20.6	10.3667	10.5667
P270	Jinhua 258	0.6	3	0.15	0.24	0.35	42.9	27.1667	16.1667	18.0333
P272	AR 133	0.64	3	0.24	0.25	0.38	38.1333	25.6	12.1	13.6667
P273	HSINCHU AI CHIO CHIENG	0.71	3	0.55	0.29	0.48	27.5	22.4667	16.2	19.1667
P274	TAIPEI 167	1	2	0.57	0.8	0.77	27.2333	22.4667	8.5	16.3667
P276	Jiabala	0.55	3	0.27	0.12	0.32	37.7667	25.8667	22.9333	21.6667
P277	Teqingxuanhui	0.9	2	0.44	0.3	0.55	31.1667	23.8667	11.0667	13.2667
P278	JWR 221	0.9	2	0.38	0.46	0.59	29.7	21.8667	10.7333	15.3333
P279	Huangsiguizhan	0.68	2	0.33	0.17	0.44	34.0667	24.2667	16.7	16.9
P280	Gongju 73	0.93	2	0.5	0.3	0.57	36.4	28.9333	15.5667	18.6
P282	BOUAKE 189	0.81	2	0.73	0.2	0.57	28.3	25.5	12	12.7
P284	Nanerai 5	0.59	3	0.62	0.23	0.45	36.3	30.9	18.5667	20.3
P285	Sichao 1	0.91	1	0.74	0.31	0.69	30.0333	27.2333	15.3667	18.6
P286	Tesanai 2	0.62	3	0.38	0.21	0.39	33	24.3	14	15
P292	K 24	0.16	5	0.67	0	0.19	34.3667	30.0333	8.76667	6.73333
P293	13946 (Guangqiu 15)	0.96	2	0.41	0.29	0.55	29.2	22	12.9667	15.4
P295	Guichao 2	0.64	3	0.73	0.23	0.49	25.6	23.0667	14.4667	15.9
P297	INIAP 6	0.83	3	0.38	0.33	0.47	33.8667	25.0333	9.26667	11.5333
P300	MBEIMBEIHUN	0.74	2	0.43	0.23	0.49	31.6333	24.0667	11.8	12.9
P302	ZACATEPEC	0.76	3	0.34	0.31	0.44	28.7333	20.6333	7.93333	9.66667
P303	71011	0.43	4	0.52	0.41	0.4	45.5667	36.6667	7.2	9.83333
P304	TAISEN GLUTINOUS YU 1157	0	5	0.55	0.18	0.2	21.4667	17.5333	10.9	11.2333
P311	Gui 630	0.7	2	0.33	0.22	0.46	38.6333	27.6667	12.9667	14.1667
P312	Taichung 65/Taichung HR539	0.6	3	0.7	0.92	0.71	30.1667	26.7333	5.1	10.6667
P313	PR106	0	5	0.16	0.24	0.12	30.0667	19.1	12.6	14.0333
P315	Chengnong Shuijing	0.91	2	0.45	0.71	0.69	35.5	27.3333	5.63333	10.1333
P316	LUBUK LINGGAU	0.78	2	0.74	0.2	0.57	26.3667	23.8333	19.7	20.7667
P317	Taichung Xianxuan 2	0.54	3	0.42	0.18	0.38	35.3667	26.6667	8.53333	8.8
P318	-	0.75	3	0.42	0.27	0.45	38.1	28.8333	9.23333	10.6667
P319	Meihuanuo	0.67	2	0.49	0.18	0.48	42.1	33.1667	20.9	21.5667
P320	Muguanuo	0.63	3	0.56	0.14	0.42	36.2	29.6667	13.2	12.7667
P321	Ninghui 21	0.51	3	0.83	0.48	0.58	31.8	30.1667	7.7	11.2667
P324	Baikehanhe	0.6	3	0.57	0.18	0.43	43.8333	36.3	18.7333	19.2
P326	SPR7284-57-5	0.83	2	0.45	0.34	0.55	37.3333	28.7333	8.63333	10.8667
P327	AUS 449	0.32	5	0.63	0.14	0.26	24.5333	20.9333	11.6333	11.3
P328	Hongdubai	0.93	2	0.42	0.13	0.5	24.4667	18.5333	9.53333	9.16667
P329	Fanhaopi	0.65	3	0.18	0.19	0.35	47.5	30.7	22.2333	23.2
P542	Mianhui 725	0.84	2	0.24	0.35	0.5	37.2667	27.57	7.52833	6.68
P565	Kehui 746	0.74	2	0.18	0.3	0.46	40.2667	27.93	12.1435	10.15
P566	Yihui 3551	0.84	1	0.46	0.42	0.64	27.0667	24.97	11.0172	10.66
P567	Fuhui 838	0.83	2	0.24	0.85	0.67	32.8	24.4	5.4282	7.95
P569	Minhui 3301	0.81	2	0.28	0.33	0.5	34.9667	27.13	13.871	12.01
P572	Gui 553	0.92	2	0.44	0.29	0.55	30.1	27.37	10.145	8.29
P573	Chenghui 3203	0.92	3	0.24	0.2	0.41	38.9667	29.03	13.0327	9.38
P584	R-Zh	0.89	2	0.38	0.34	0.55	27.7333	23.87	10.7632	9.45
P585	S112 Xuan	0.82	3	0.28	0.31	0.44	41.1	31.83	12.423	10.52
P589	Ewan 17B	0	5	0.45	0.38	0.24	23.2	21.25	15.3361	14.16
P595	JAMBALI	0.63	3	0.5	0.96	0.68	34.2667	32.83	8.74773	13.87
P596	JAMBALI	0.65	3	0.47	0.52	0.52	25.8333	24.13	12.6771	13.71
P597	Haogela	0.78	2	0.29	0.52	0.57	40.1333	31.47	10.7209	11.66
P599	-	0.77	2	0.42	0.61	0.62	33.8	30.07	8.6207	10.25
P600	C418	0.36	3	0.16	0.37	0.35	50.1667	33.83	13.1005	11.91
P601	KURULU WEE (WHITE)	0.61	5	0.27	0.81	0.45	23.4333	18.07	3.90387	5.55
P602	FIDJI	0.56	4	0.26	0.2	0.29	32.9	24.87	9.6962	6.95
P603	TAK SUFAID	0.67	3	0.31	0	0.32	41.1333	32.87	15.1667	7.38
P604	SLAVA	0.55	3	0.3	0.37	0.41	51.2	40.57	8.29047	7.53
P605	SAHEL 108	0.7	2	0.38	0.25	0.48	26.3667	22.67	10.7886	8.36
P606	BATHURI	0.48	3	0.38	0.26	0.39	37.7	32.3	16.1321	12.66
P608	DANGAR	0.81	2	0.55	0.58	0.66	33.8333	33.93	11.6693	13.52
P610	B 6136-3-TB-0-1-5	0.36	3	0.34	0.33	0.38	27.4667	22.63	9.47603	8.16
P611	Zhongchao 123	0.6	2	0.41	0.3	0.49	32.1333	28.33	12.8464	10.74
P612	Gang 46B	0.66	2	0.19	0.47	0.5	33.5667	23.63	13.9304	14.31
P614	GRITNA	0.33	4	0.52	0.38	0.37	34.8667	34.1	14.3876	13.21
P616	Gaozi	0.97	4	0.44	0.29	0.44	27.2333	24.7	10.1874	8.37
P617	G318	0.69	3	0.35	0.47	0.49	30.1667	25.23	8.95947	9.23
P619	Zixiang 3	0.86	2	0.37	0.6	0.63	36.4	30.87	9.89947	11.65
P620	Hongxiang 2	0.58	3	0.45	0.46	0.49	20.0333	18.43	10.5769	10.75
P621	Lvxiang 3	0.23	4	0.14	0.26	0.22	37.1667	24.5	11.5677	9.15
P622	Huangxiang 2	0.03	5	0.24	0.3	0.17	36.8	27.5	12.8803	10.73
P623	Ningxiang Yuanzinuo	0.57	5	0.32	0.27	0.27	31.5	25.6	12.7363	10.19
P624	Ningxiang Changzinuo	0.94	4	0.3	0.47	0.46	35.7667	28.37	10.8056	11.12
P634	Youxi Honggumi	0.66	3	0.6	0.29	0.48	20.1	20.97	14.0235	11.42
P635	Vietnam Red Rice	0.81	3	0.62	0.48	0.58	24.7	26.1	12.008	12.41
LSRI, leaf senescence resistance index; LW, leaf wilting score; DPH, drought resistance coefficient of plant height; DRL, drought resistance coefficient of root length; CDTM, comprehensive drought tolerance metric; PH-CK, plant height in the control group; PH-TR, plant height in the treatment group; RL-CK, root length in the control group; RL-TR, root length in the treatment group.

## Sheet: Table S3
Table S3 – Descriptive statistics of traits in 283 rice accessions
Traits	Group	Max	Min	Mean	SD	CV(%)
Plant height (cm)	Control(CK)	50.2	14.7	33.3	6.37	19.11
	Drought(TR)	40.6	16.4	26.4	4.22	15.99
Root length (cm)	Control(CK)	23.6	3.9	12.2	3.7	30.31
	Drought(TR)	23.3	5.6	13.3	3.79	28.52
Leaf senescence resistance index(%)		94.6	0	66.1	18.24	27.61
Leaf wilting score		5	1	2.6	0.95	37.02

## Sheet: Table S4
Table S4 – Drought tolerance classification of 283 rice accessions
Accession	Hierarchical clustering analysis	Stepwise classification
Minghui 63	strongly drought-tolerant	highly drought-tolerant
Chorofa	moderately drought-tolerant	drought-tolerant
D15	mildly drought-tolerant	moderately drought-tolerant
829	moderately drought-tolerant	drought-tolerant
MERLE	extremely drought-tolerant	highly drought-tolerant
RR 272-17-829	moderately drought-tolerant	drought-tolerant
K 479-2-3	moderately drought-tolerant	moderately drought-tolerant
Zaoxian 14	moderately drought-tolerant	drought-tolerant
IRGA 959-1-2-2F-4-1-4A-6-CA-6X	moderately drought-tolerant	moderately drought-tolerant
IR65600-27-1-2-2	moderately drought-tolerant	drought-tolerant
Zhongjian 100	moderately drought-tolerant	drought-tolerant
E 2040	strongly drought-tolerant	highly drought-tolerant
Guangluai 4	mildly drought-tolerant	moderately drought-tolerant
Zhongyouzao 81	extremely drought-tolerant	highly drought-tolerant
MONOLAYA	mildly drought-tolerant	moderately drought-tolerant
OM997	strongly drought-tolerant	highly drought-tolerant
LALSAITA	strongly drought-tolerant	drought-tolerant
DANAU LAUT TAWAR	mildly drought-tolerant	moderately drought-tolerant
ICTA CRISPO 38	strongly drought-tolerant	highly drought-tolerant
IR 75870-5-8-5-B-1	extremely drought-tolerant	highly drought-tolerant
IR77298-14-1-2	weakly drought-tolerant	highly drought-sensitive
IR55419-04	extremely drought-tolerant	highly drought-tolerant
Ajaya	strongly drought-tolerant	highly drought-tolerant
P59279	strongly drought-tolerant	highly drought-tolerant
Guang 122	moderately drought-tolerant	moderately drought-tolerant
IRAT 144	moderately drought-tolerant	drought-tolerant
93072	moderately drought-tolerant	moderately drought-tolerant
Maravilha	moderately drought-tolerant	drought-tolerant
BG304	moderately drought-tolerant	drought-tolerant
YZX1	mildly drought-tolerant	moderately drought-tolerant
TKM 9	moderately drought-tolerant	drought-tolerant
Ya Nong Zao 4	strongly drought-tolerant	highly drought-tolerant
BD007	extremely drought-sensitive	highly drought-sensitive
E 2024	mildly drought-tolerant	moderately drought-tolerant
Y134	strongly drought-tolerant	highly drought-tolerant
Amol 3 (Sana)	weakly drought-tolerant	drought-sensitive
Bg 300	mildly drought-tolerant	moderately drought-tolerant
BEGMI 135	weakly drought-tolerant	highly drought-sensitive
YZX2	mildly drought-tolerant	moderately drought-tolerant
WAS 198-B-3-1-3	strongly drought-tolerant	highly drought-tolerant
IR 56	mildly drought-tolerant	moderately drought-tolerant
NX 3533	moderately drought-tolerant	moderately drought-tolerant
Bg 94-1	strongly drought-tolerant	highly drought-tolerant
Y075	moderately drought-tolerant	drought-tolerant
NERICA-L-27	moderately drought-tolerant	moderately drought-tolerant
Molizhanxuan	strongly drought-tolerant	highly drought-tolerant
Wanxian 763	moderately drought-tolerant	drought-tolerant
CT 6510-24-1-2	moderately drought-tolerant	moderately drought-tolerant
SONA (IET 1991)	strongly drought-tolerant	highly drought-tolerant
Fengaizhan	moderately drought-tolerant	drought-tolerant
Yuexiangzhan	mildly drought-tolerant	moderately drought-tolerant
Hnankar	moderately drought-tolerant	drought-tolerant
IR68552-55-3-2	moderately drought-tolerant	drought-tolerant
OM1706	moderately drought-tolerant	moderately drought-tolerant
IRBB7	moderately drought-tolerant	drought-tolerant
Huhan 15	moderately drought-tolerant	drought-tolerant
Giza 14	weakly drought-tolerant	highly drought-sensitive
UPL RI-7	mildly drought-tolerant	moderately drought-tolerant
GIZA 178	moderately drought-tolerant	moderately drought-tolerant
SAMBALA MALO	strongly drought-tolerant	highly drought-tolerant
IR 57514-PMI 5-B-1-2	moderately drought-tolerant	drought-tolerant
C70	moderately drought-tolerant	drought-tolerant
LX2007	moderately drought-tolerant	drought-tolerant
MAYBELLE	extremely drought-sensitive	highly drought-sensitive
R644	moderately drought-tolerant	moderately drought-tolerant
Ganwanxian 37 (926)	strongly drought-tolerant	highly drought-tolerant
Huangsizhan	strongly drought-tolerant	highly drought-tolerant
IR 80310-12-B-1-3-B	mildly drought-tolerant	moderately drought-tolerant
Govind	mildly drought-tolerant	moderately drought-tolerant
NSIC RC9 (APO)	moderately drought-tolerant	moderately drought-tolerant
Hua 565	moderately drought-tolerant	drought-tolerant
PT60	strongly drought-tolerant	highly drought-tolerant
KinandangPatong	mildly drought-tolerant	moderately drought-tolerant
BR11	mildly drought-tolerant	moderately drought-tolerant
Huajingxian 74	strongly drought-tolerant	highly drought-tolerant
IR66897B	moderately drought-tolerant	drought-tolerant
Chhomrong	extremely drought-tolerant	highly drought-tolerant
Palung 2	moderately drought-tolerant	drought-tolerant
Qb_604	moderately drought-tolerant	moderately drought-tolerant
FL478	moderately drought-tolerant	drought-tolerant
IR68	strongly drought-tolerant	highly drought-tolerant
SAGC-4	strongly drought-tolerant	highly drought-tolerant
Zhonghua 1	extremely drought-tolerant	highly drought-tolerant
KCD1	weakly drought-tolerant	drought-sensitive
Shwe Thwe Yin HYV	strongly drought-tolerant	highly drought-tolerant
PSBRC88	moderately drought-tolerant	moderately drought-tolerant
X23	mildly drought-tolerant	moderately drought-tolerant
IRBB62	moderately drought-tolerant	drought-tolerant
Jinkouzhuixing material	weakly drought-tolerant	drought-sensitive
1088	mildly drought-tolerant	moderately drought-tolerant
Kehui 746	mildly drought-tolerant	moderately drought-tolerant
Yihui 3551	strongly drought-tolerant	highly drought-tolerant
Fuhui 838	strongly drought-tolerant	highly drought-tolerant
Mianhui 725	mildly drought-tolerant	moderately drought-tolerant
Minhui 3301	mildly drought-tolerant	moderately drought-tolerant
Gui 553	moderately drought-tolerant	moderately drought-tolerant
Chenghui 3203	weakly drought-tolerant	drought-sensitive
R-Zh	moderately drought-tolerant	moderately drought-tolerant
S112 Xuan	mildly drought-tolerant	moderately drought-tolerant
Ewan 17B	extremely drought-sensitive	highly drought-sensitive
JAMBALI	strongly drought-tolerant	highly drought-tolerant
JAMBALI	moderately drought-tolerant	moderately drought-tolerant
Haogelao	moderately drought-tolerant	drought-tolerant
A599	strongly drought-tolerant	highly drought-tolerant
C418	weakly drought-tolerant	highly drought-sensitive
KURULU WEE (WHITE)	mildly drought-tolerant	moderately drought-tolerant
FIDJI	extremely drought-sensitive	highly drought-sensitive
TAK SUFAID	weakly drought-tolerant	highly drought-sensitive
SLAVA	weakly drought-tolerant	drought-sensitive
SAHEL 108	mildly drought-tolerant	moderately drought-tolerant
BATHURI	weakly drought-tolerant	drought-sensitive
DANGAR	strongly drought-tolerant	highly drought-tolerant
B 6136-3-TB-0-1-5	weakly drought-tolerant	drought-sensitive
Zhongchao 123	mildly drought-tolerant	moderately drought-tolerant
Gang 46B	mildly drought-tolerant	moderately drought-tolerant
GRITNA	weakly drought-tolerant	highly drought-sensitive
Gaozi	mildly drought-tolerant	moderately drought-tolerant
G318	mildly drought-tolerant	moderately drought-tolerant
Zixiang 3	strongly drought-tolerant	highly drought-tolerant
Hongxiang 2	mildly drought-tolerant	moderately drought-tolerant
Lvxiang 3	extremely drought-sensitive	highly drought-sensitive
Huangxiang 2	extremely drought-sensitive	highly drought-sensitive
Ningxiang Yuanzinuo	extremely drought-sensitive	highly drought-sensitive
Ningxiang Changzinuo	mildly drought-tolerant	moderately drought-tolerant
Youxi Honggumi	mildly drought-tolerant	moderately drought-tolerant
Vietnam Red Rice	moderately drought-tolerant	drought-tolerant
E 2070	mildly drought-tolerant	moderately drought-tolerant
Erjiunan 1	mildly drought-tolerant	moderately drought-tolerant
Lai Nok Kha	weakly drought-tolerant	drought-sensitive
Xiangchangzao	mildly drought-tolerant	moderately drought-tolerant
Aijiaonante	mildly drought-tolerant	moderately drought-tolerant
Liuliyou	weakly drought-tolerant	drought-sensitive
Rongdao 4	weakly drought-tolerant	drought-sensitive
Luoaizao 3	weakly drought-tolerant	highly drought-sensitive
M 6034-1	strongly drought-tolerant	highly drought-tolerant
KWANG-LU-AI 4	extremely drought-sensitive	highly drought-sensitive
Guangluai 4	mildly drought-tolerant	moderately drought-tolerant
Jinnante B	weakly drought-tolerant	highly drought-sensitive
Sanbaili	strongly drought-tolerant	highly drought-tolerant
Huoqing	mildly drought-tolerant	moderately drought-tolerant
L 301B	mildly drought-tolerant	moderately drought-tolerant
SXC216	mildly drought-tolerant	moderately drought-tolerant
Vietnam Early Rice	mildly drought-tolerant	moderately drought-tolerant
Jiangnongzao 1 B	extremely drought-tolerant	highly drought-tolerant
Anfuzhan	weakly drought-tolerant	drought-sensitive
Zhuzhen B	mildly drought-tolerant	moderately drought-tolerant
Zaoxian 240	weakly drought-tolerant	drought-sensitive
Baoxie-7B	mildly drought-tolerant	moderately drought-tolerant
Longge 33	moderately drought-tolerant	drought-tolerant
Chenghui 448	mildly drought-tolerant	moderately drought-tolerant
D11	strongly drought-tolerant	highly drought-tolerant
KR200	weakly drought-tolerant	highly drought-sensitive
E Zi 96	mildly drought-tolerant	moderately drought-tolerant
IRGA 370-38-1-1F-C4-2	weakly drought-tolerant	highly drought-sensitive
IR 2344-P1 PB-9-3-2B	mildly drought-tolerant	moderately drought-tolerant
IR 57920-AC-25-2-B	moderately drought-tolerant	moderately drought-tolerant
WAS 173-B-B-6-2-2	mildly drought-tolerant	moderately drought-tolerant
ARAURE 1	extremely drought-sensitive	highly drought-sensitive
AMISTAD 82	extremely drought-sensitive	highly drought-sensitive
Bala	weakly drought-tolerant	drought-sensitive
UNNAMED	mildly drought-tolerant	moderately drought-tolerant
CALIFORNIA BELLE	mildly drought-tolerant	moderately drought-tolerant
IR64-IL	strongly drought-tolerant	highly drought-tolerant
NERICA-L-1	strongly drought-tolerant	highly drought-tolerant
B 6144-MR-6-0-0	mildly drought-tolerant	moderately drought-tolerant
WAS 199-B-1-2-1	weakly drought-tolerant	highly drought-sensitive
X21	mildly drought-tolerant	moderately drought-tolerant
BW311-9	weakly drought-tolerant	moderately drought-tolerant
IR 2003-P7-7-4-2	weakly drought-tolerant	drought-sensitive
Sanhuangzhan No. 2	weakly drought-tolerant	drought-sensitive
IR58025B	weakly drought-tolerant	drought-sensitive
CYPRESS	mildly drought-tolerant	moderately drought-tolerant
Matatag 2	mildly drought-tolerant	moderately drought-tolerant
GLADIO	weakly drought-tolerant	drought-sensitive
IR64a	moderately drought-tolerant	moderately drought-tolerant
WAS 206-B-B-2-2-1	moderately drought-tolerant	drought-tolerant
IR8192-200-3-3-1-1	moderately drought-tolerant	moderately drought-tolerant
IR68897B	moderately drought-tolerant	drought-tolerant
B6136-3-TB-0-1-5	strongly drought-tolerant	highly drought-tolerant
IRI 339	mildly drought-tolerant	moderately drought-tolerant
Jiangxi Simiao	mildly drought-tolerant	moderately drought-tolerant
Carijo	strongly drought-tolerant	highly drought-tolerant
C71	extremely drought-tolerant	highly drought-tolerant
PATISAIL	moderately drought-tolerant	drought-tolerant
At354	mildly drought-tolerant	moderately drought-tolerant
IR74	mildly drought-tolerant	moderately drought-tolerant
G Zhenshan 97B	weakly drought-tolerant	drought-sensitive
KANGRI	weakly drought-tolerant	drought-sensitive
N'YA NOFF	moderately drought-tolerant	moderately drought-tolerant
Hongyangzao 3	mildly drought-tolerant	moderately drought-tolerant
Dongtingwanxian	weakly drought-tolerant	drought-sensitive
Chenwan 3	mildly drought-tolerant	moderately drought-tolerant
Xiangwanxian 1	weakly drought-tolerant	highly drought-sensitive
KAMULI	extremely drought-sensitive	highly drought-sensitive
CN44-40-7	weakly drought-tolerant	highly drought-sensitive
KABERI	weakly drought-tolerant	drought-sensitive
Sri Lanka 1	weakly drought-tolerant	highly drought-sensitive
Liangguang	weakly drought-tolerant	highly drought-sensitive
Shuangbaiai 2	mildly drought-tolerant	moderately drought-tolerant
SUNAR	weakly drought-tolerant	drought-sensitive
W 398	weakly drought-tolerant	drought-sensitive
Nante	mildly drought-tolerant	moderately drought-tolerant
Daguai 7	moderately drought-tolerant	moderately drought-tolerant
Jiangerzao	weakly drought-tolerant	drought-sensitive
PJ110	mildly drought-tolerant	moderately drought-tolerant
Guangxuanliuhao	mildly drought-tolerant	moderately drought-tolerant
Zuihou	weakly drought-tolerant	drought-sensitive
IR 77298-14-1-2-10	mildly drought-tolerant	moderately drought-tolerant
531	weakly drought-tolerant	highly drought-sensitive
FACAGRO 406	weakly drought-tolerant	highly drought-sensitive
Qunxuanzao	moderately drought-tolerant	drought-tolerant
IRAT 10	mildly drought-tolerant	moderately drought-tolerant
Guangluai 15-1	mildly drought-tolerant	moderately drought-tolerant
Mamagu	weakly drought-tolerant	drought-sensitive
ARC 11777	mildly drought-tolerant	moderately drought-tolerant
Fanwu	weakly drought-tolerant	highly drought-sensitive
E Zi 110	weakly drought-tolerant	drought-sensitive
Xiaohonggu	weakly drought-tolerant	drought-sensitive
Dangyu 5	extremely drought-tolerant	highly drought-tolerant
78 Xuanwu	mildly drought-tolerant	moderately drought-tolerant
KUNJUKUNJU	moderately drought-tolerant	drought-tolerant
PERUBAK LUEY	weakly drought-tolerant	drought-sensitive
RP20-12	weakly drought-tolerant	highly drought-sensitive
GZ 1368-5-4	weakly drought-tolerant	drought-sensitive
Aitougu 151	mildly drought-tolerant	moderately drought-tolerant
Momi	weakly drought-tolerant	drought-sensitive
E Zi 100	moderately drought-tolerant	moderately drought-tolerant
Cungunuo	mildly drought-tolerant	moderately drought-tolerant
NCS349	weakly drought-tolerant	highly drought-sensitive
Qingtaiai	moderately drought-tolerant	moderately drought-tolerant
PL 3165	weakly drought-tolerant	highly drought-sensitive
Heidu 4	weakly drought-tolerant	drought-sensitive
Xugunuo	strongly drought-tolerant	highly drought-tolerant
IR 3839-1	weakly drought-tolerant	drought-sensitive
RATNAGIRI 45-2	mildly drought-tolerant	moderately drought-tolerant
PORONG	weakly drought-tolerant	drought-sensitive
TAICHUNG SEN-YU 214	moderately drought-tolerant	drought-tolerant
B 737G-KN-23-1	moderately drought-tolerant	moderately drought-tolerant
IR 73571-3B-11-3-K2	mildly drought-tolerant	moderately drought-tolerant
Youzhan	mildly drought-tolerant	moderately drought-tolerant
Chengduai 3	strongly drought-tolerant	highly drought-tolerant
88B	moderately drought-tolerant	moderately drought-tolerant
Nanjing 11	moderately drought-tolerant	drought-tolerant
Zhenxian 232	strongly drought-tolerant	highly drought-tolerant
Liusha 1	mildly drought-tolerant	moderately drought-tolerant
ARC 6579	weakly drought-tolerant	drought-sensitive
Hongwan 1	weakly drought-tolerant	highly drought-sensitive
Jinhua 258	weakly drought-tolerant	highly drought-sensitive
AR 133	weakly drought-tolerant	drought-sensitive
HSINCHU AI CHIO CHIENG	mildly drought-tolerant	moderately drought-tolerant
TAIPEI 167	extremely drought-tolerant	highly drought-tolerant
Jiabala	weakly drought-tolerant	highly drought-sensitive
Teqingxuanhui	moderately drought-tolerant	moderately drought-tolerant
JWR 221	moderately drought-tolerant	drought-tolerant
Huangsiguizhan	mildly drought-tolerant	moderately drought-tolerant
Gongju 73	moderately drought-tolerant	drought-tolerant
BOUAKE 189	moderately drought-tolerant	drought-tolerant
Nanerai 5	mildly drought-tolerant	moderately drought-tolerant
Sichao 1	strongly drought-tolerant	highly drought-tolerant
Tesanai 2	weakly drought-tolerant	drought-sensitive
K 24	extremely drought-sensitive	highly drought-sensitive
13946 (Guangqiu 15)	moderately drought-tolerant	moderately drought-tolerant
Guichao 2	mildly drought-tolerant	moderately drought-tolerant
INIAP 6	mildly drought-tolerant	moderately drought-tolerant
MBEIMBEIHUN	mildly drought-tolerant	moderately drought-tolerant
ZACATEPEC	mildly drought-tolerant	moderately drought-tolerant
71011	weakly drought-tolerant	drought-sensitive
TAISEN GLUTINOUS YU 1157	extremely drought-sensitive	highly drought-sensitive
Gui 630	mildly drought-tolerant	moderately drought-tolerant
Taichung 65/Taichung HR539	strongly drought-tolerant	highly drought-tolerant
PR106	extremely drought-sensitive	highly drought-sensitive
Chengnong Shuijing	strongly drought-tolerant	highly drought-tolerant
LUBUK LINGGAU	moderately drought-tolerant	drought-tolerant
Taichung Xianxuan 2	weakly drought-tolerant	drought-sensitive
A318	mildly drought-tolerant	moderately drought-tolerant
Meihuanuo	mildly drought-tolerant	moderately drought-tolerant
Muguanuo	weakly drought-tolerant	drought-sensitive
Ninghui 21	moderately drought-tolerant	drought-tolerant
Baikehanhe	weakly drought-tolerant	moderately drought-tolerant
SPR7284-57-5	moderately drought-tolerant	moderately drought-tolerant
AUS 449	extremely drought-sensitive	highly drought-sensitive
Hongdubai	mildly drought-tolerant	moderately drought-tolerant
Fanhaopi	weakly drought-tolerant	highly drought-sensitive
The 283 accessions were classified by hierarchical clustering and stepwise classification based on the comprehensive drought tolerance metric (CDTM). A318 and A599 are internal experimental line codes (no official cultivar names).

## Sheet: Table S5
Table S5 – Phenotypes of extremely drought-tolerant accessions
Accession	LSRI	LW	DPH	DRL	CDTM
C71	0.89	1	0.74	2.21	0.84
Jiangnongzao 1B	0.88	1	0.81	2.07	0.84
MERLE	0.89	1	0.85	1.43	0.77
TAIPEI 167	0.91	2	0.83	1.93	0.77
Dangyu 5	0.69	2	0.83	2.08	0.76
Chhomromg	0.95	1	0.89	1.29	0.76
Zhongyouzao 81	0.78	1	0.84	1.44	0.75
Zhonghua 1	0.91	1	0.92	1.26	0.75
IR55419-04	0.81	1	0.85	1.37	0.74
IR 75870-5-8-5-B-1	0.78	2	0.84	1.55	0.72
LSRI, Leaf senescence resistance index; LW, leaf wilting score; DPH, drought resistance coefficient of plant height; DRL, drought resistance coefficient of root length; CDTM, comprehensive drought tolerance metric.

## Sheet: Table S6
Table S6 – Significant SNPs associated with drought-related traits identified by GWAS
SNP	Chromosome	Position (bp)	LOD score	-log10(P-value)'	Traits
S1-1	1	573659	3.4871	4.2117	CDTM
S1-2	1	579923	3.673	4.4077	LSRI
S1-3	1	676496	3.3724	4.0904	LW
S1-4	1	688231	6.3623	7.2073	DRL
S1-5	1	857964	4.4812	5.2554	LW
			5.85	6.6779	CDTM
S1-6	1	879891	4.6014	5.3809	LW
S1-7	1	2565911	3.6453	4.3785	LSRI
S1-8	1	2572057	5.6252	6.4451	CDTM
S1-9	1	24850954	3.3436	4.0599	DRL
S1-10	1	32257682	3.8788	4.6243	DRL
S1-11	1	34784504	3.1234	3.8265	DRL
S1-12	1	39991434	4.056	4.8103	DPH
S2-1	2	67365	4.0663	4.8211	CDTM
S2-2	2	5660711	4.1665	4.9261	CDTM
S2-3	2	5681196	3.8884	4.6343	CDTM
S2-4	2	5845949	4.6649	5.4471	DRL
S2-5	2	8757361	3.2741	3.9863	DPH
S2-6	2	18680577	4.8361	5.6255	CDTM
S2-7	2	24325268	3.6929	4.4287	CDTM
S2-8	2	28343855	3.2479	3.9586	DRL
S2-9	2	35058313	4.0027	4.7544	LW
S2-10	2	35080087	4.2965	5.0623	CDTM
S2-11	2	35436023	3.0664	3.7659	LSRI
S3-1	3	4236148	3.0802	3.7806	DRL
S3-2	3	4278850	3.3186	4.0334	DRL
S3-3	3	6426733	3.4636	4.1868	DRL
S3-4	3	23951464	8.9429	9.858	CDTM
S3-5	3	24677748	6.4112	7.2577	DPH
S3-6	3	28063750	3.1877	3.8947	LW
			4.1257	4.8834	CDTM
S3-7	3	33319900	3.5172	4.2434	DRL
S3-8	3	35385154	3.0518	3.7504	DRL
S4-1	4	1249949	3.7766	4.5168	DPH
S4-2	4	4083136	3.1187	3.8215	DRL
S4-3	4	6993506	9.2225	10.1439	LW
S4-4	4	7104040	3.3872	4.106	LW
S4-5	4	8294958	3.6072	4.3384	DRL
S4-6	4	11096886	3.4496	4.172	CDTM
S4-7	4	14194736	3.6915	4.4272	LW
S4-8	4	17923148	4.2563	5.0202	LW
S4-9	4	22031114	4.1793	4.9396	LW
S4-10	4	24703661	3.8784	4.6239	LSRI
S5-1	5	359728	3.1256	3.8288	LSRI
S5-2	5	1812055	3.5112	4.2371	CDTM
			3.7091	4.4458	DRL
S5-3	5	11902997	3.0727	3.7726	DRL
S5-4	5	18206841	6.1836	7.0228	LW
S5-5	5	27550691	3.2868	3.9998	DPH
S5-6	5	28766596	3.817	4.5593	LW
			4.8055	5.5937	CDTM
			7.2397	8.1111	LSRI
S5-7	5	28882435	4.6096	5.3894	CDTM
			3.7447	4.4833	LSRI
S5-8	5	28919221	5.8668	6.6953	LW
S5-9	5	28923354	9.2558	10.178	LSRI
S6-1	6	4841007	6.5726	7.4242	LW
S6-2	6	6658970	3.4671	4.1905	LW
S6-3	6	17480173	5.0366	5.8342	LW
			3.8473	4.5912	CDTM
			3.9642	4.714	LSRI
S6-4	6	18860005	3.3067	4.0208	DRL
S6-5	6	20599168	3.0299	3.7271	CDTM
S6-6	6	22642973	4.0039	4.7557	DPH
S6-7	6	27371907	3.0578	3.7567	LW
S6-8	6	29623951	4.5039	5.2791	DRL
S7-1	7	479752	4.8357	5.6251	CDTM
S7-2	7	1758165	3.8433	4.587	DRL
S7-3	7	8533409	3.4426	4.1646	LSRI
S7-4	7	9931429	6.0796	6.9153	DRL
S7-5	7	10677087	3.7373	4.4754	LSRI
S7-6	7	15726275	5.5943	6.4131	CDTM
S7-7	7	16182547	12.0848	13.0626	DRL
S7-8	7	17553044	3.3187	4.0336	LW
S7-9	7	17643673	4.0693	4.8243	LW
S7-10	7	18965507	3.9487	4.6977	DRL
S7-11	7	20780373	3.113	3.8154	LSRI
S7-12	7	20925013	3.606	4.3371	DRL
S7-13	7	21127693	4.6031	5.3826	CDTM
S7-14	7	21159169	3.3143	4.0289	LSRI
S7-15	7	21335996	3.821	4.5635	LSRI
S7-16	7	22204554	3.2847	3.9975	LSRI
S7-17	7	25191377	3.2382	3.9483	LW
S8-1	8	417051	3.9003	4.6469	DRL
S8-2	8	1409084	3.3405	4.0566	CDTM
S8-3	8	5281651	3.0302	3.7274	DRL
S8-4	8	8348398	3.7797	4.5201	LSRI
S8-5	8	9003290	3.8462	4.59	DRL
S8-6	8	9004469	3.8575	4.6019	DRL
S8-7	8	9348413	3.7269	4.4645	CDTM
S8-8	8	10157608	4.1042	4.8609	DRL
S8-9	8	11824826	5.4992	6.3145	LSRI
S8-10	8	13557256	5.1275	5.9287	DPH
S8-11	8	16851510	3.0369	3.7345	LW
S8-12	8	26496666	4.1253	4.883	DPH
S8-13	8	26867922	3.0328	3.7302	LW
S9-1	9	7928813	9.1786	10.0991	LSRI
S9-2	9	8120974	4.4823	5.2565	LW
S9-3	9	8124483	5.3846	6.1957	LW
S9-4	9	9659421	5.6252	6.4451	LSRI
S9-5	9	10493833	4.5657	5.3436	CDTM
S9-6	9	11099954	3.8212	4.5637	LSRI
S9-7	9	11462219	4.4486	5.2213	LW
S9-8	9	12112164	7.805	8.6919	DRL
S9-9	9	16753233	5.2974	6.1052	DPH
S9-10	9	21131492	3.3189	4.0338	LW
S10-1	10	2708327	3.6948	4.4307	LSRI
S10-2	10	3744998	3.7154	4.4524	LSRI
S10-3	10	10703309	3.4581	4.181	LSRI
S10-4	10	11601883	3.4256	4.1466	LSRI
S10-5	10	12007293	7.0088	7.8736	LW
S10-6	10	15057468	3.3098	4.0241	CDTM
S10-7	10	23118054	9.9902	10.9283	DPH
S11-1	11	4912629	6.7514	7.6085	CDTM
S11-2	11	5216762	3.4294	4.1507	DPH
S11-3	11	5458847	6.9559	7.8191	LSRI
S11-4	11	5532069	3.3983	4.1178	DRL
S11-5	11	5645048	3.657	4.3909	CDTM
			3.862	4.6066	LSRI
S11-6	11	13128337	5.8796	6.7085	LSRI
S11-7	11	13886989	3.9696	4.7197	DRL
S11-8	11	21708524	3.1035	3.8053	DRL
S11-9	11	21888809	7.9311	8.8214	CDTM
S11-10	11	25191249	3.0447	3.7428	CDTM
S11-11	11	26383437	3.2381	3.9482	DPH
S11-12	11	26385179	3.3177	4.0325	DPH
S11-13	11	26486968	3.0323	3.7296	DPH
S12-1	12	4256402	3.3794	4.0978	DPH
S12-2	12	6430862	3.3391	4.0552	LW
			4.6889	5.4721	LSRI
S12-3	12	6874713	4.6419	5.4231	DPH
S12-4	12	7031776	5.3252	6.134	CDTM
S12-5	12	8577527	5.5816	6.4	LSRI
S12-6	12	10364819	4.6982	5.4818	CDTM
S12-7	12	13182932	4.9293	5.7226	DRL
S12-8	12	15908467	3.4346	4.1562	LSRI
S12-9	12	17851545	4.6552	5.437	CDTM
S12-10	12	21094604	6.0709	6.9063	DPH
LSRI, leaf senescence resistance index; LW, leaf wilting score; DPH, drought resistance coefficient of plant height; DRL, drought resistance coefficient of root length; CDTM, comprehensive drought tolerance metric

## Sheet: Table S7
Table S7 – SNPs significantly associated with multiple drought-related traits
SNP	Trait	Chr	Position (bp)	LOD score	-log10(P-value)
S1-5	LW	1	857964	4.48	5.26
	CDTM			5.85	6.68
S3-6	LW	3	28063750	3.19	3.89
	CDTM			4.13	4.88
S5-2	CDTM	5	1812055	3.51	4.24
	DRL			3.71	4.45
S5-6	LW	5	28766596	3.82	4.56
	CDTM			4.81	5.59
	LSRI			7.24	8.11
S5-7	CDTM	5	28882435	4.61	5.39
	LSRI			3.74	4.48
S6-3	LW	6	17480173	5.04	5.83
	CDTM			3.85	4.59
	LSRI			3.96	4.71
S11-5	CDTM	11	5645048	3.66	4.39
	LSRI			3.86	4.61
S12-2	LW	12	6430862	3.34	4.06
	LSRI			4.69	5.47
LSRI, leaf senescence resistance index; LW, leaf wilting score; DRL, drought resistance coefficient of root length; CDTM, comprehensive drought tolerance metric

## Sheet: Table S8
Table S8 – Candidate genes associated with leaf senescence resistance index
SNP	Gene ID	Chromosome	Start (bp)	End (bp)	Drought relatedgene/annotation
S1-2	Os01g0111600	chr01	612564	615631
	Os01g0110100	chr01	537710	543354
S1-7	Os01g0147200	chr01	2560897	2565321
	Os01g0147900	chr01	2589835	2593568
S4-10	Os04g0494100	chr04	24708801	24709910
	Os04g0493100	chr04	24655178	24660067
S5-6	Os05g0576800	chr05	28721012	28726493	OsMPK17, mitogen activated protein kinase (MAPK)
S5-7	Os05g0580000	chr05	28871794	28877277
	Os05g0580500	chr05	28889542	28896992
S6-3	Os06g0498150	chr06	17470732	17471497
	Os06g0498500	chr06	17505127	17511961
	Os06g0498400	chr06	17489355	17500497
S7-5	Os07g0281700	chr07	10724596	10738019	OsAO3, aldehyde oxidase
S7-11	Os07g0529800	chr07	20733236	20735266
S7-15	Os07g0541500	chr07	21384789	21388269
	Os07g0540366	chr07	21315542	21316587
	Os07g0541400	chr07	21378090	21381229
S7-16	Os07g0556800	chr07	22222300	22223336	OsRIP18, ribosome- inactivating protein
	Os07g0557100	chr07	22231027	22234551
S8-4	Os08g0237000	chr08	8328017	8329241
	Os08g0237200	chr08	8342253	8346555
S9-1	Os09g0306700	chr09	7914083	7925334
	Os09g0306800	chr09	7925628	7938161
S10-2	Os10g0159700	chr10	3785717	3787397
S10-4	Os10g0369900	chr10	11624392	11629513
	Os10g0369000	chr10	11581310	11585280
S11-5	Os11g0209700	chr11	5653230	5663574

## Sheet: Table S9
Table S9 – Candidate Genes associated with leaf wilting score
SNP	Gene ID	Chromosome	Start (bp)	End (bp)	Drought-related gene/annotation
S1-6	Os01g0116600	chr01	929884	934458
S2-9	Os02g0816800	chr02	35013576	35017647
	Os02g0817500	chr02	35067978	35072582
	Os02g0817600	chr02	35073371	35075799
	Os02g0817700	chr02	35080879	35085196
	Os02g0817800	chr02	35085667	35090652
	Os02g0818000	chr02	35092344	35093744
	Os02g0816900	chr02	35026196	35040445
	Os02g0817900	chr02	35091247	35099291
S3-6	Os03g0699000	chr03	28021888	28022831
	Os03g0699700	chr03	28049600	28053580	OsLOX3 , lipoxygenase
	Os03g0700400	chr03	28090066	28094467
	Os03g0700700	chr03	28106903	28113300
S4-3	Os04g0202300	chr04	6955489	6957924
	Os04g0202500	chr04	6966605	6969072
	Os04g0202800	chr04	6976798	6979276
S4-9	Os04g0442300	chr04	22023832	22027680
S5-6	Os05g0576800	chr05	28721012	28726493	OsMPK17, mitogen-activated protein kinase (MAPK)
S5-8	Os05g0580000	chr05	28871794	28877277
	Os05g0580500	chr05	28889542	28896992
S6-2	Os06g0228200	chr06	6648404	6653002
S6-3	Os06g0498150	chr06	17470732	17471497
	Os06g0498500	chr06	17505127	17511961
	Os06g0498400	chr06	17489355	17500497
S7-17	Os07g0613300	chr07	25239766	25247925
S8-13	Os08g0538300	chr08	26909127	26913494
	Os08g0537800	chr08	26883126	26887362
S9-7	Os09g0356000	chr09	11427219	11435151
S9-10	Os09g0537700	chr09	21155963	21157945	OsRNS4|OsRRP,S-like ribonuclease

## Sheet: Table S10
Table S10 – Candidate genes associated with DRC of plant height
SNP	Gene ID	Chromosome	Start (bp)	End (bp)	Drought-related gene/annotation
S1-12	Os01g0916400	chr01	39948114	39951519
	Os01g0917500	chr01	40018401	40023853
	Os01g0917400	chr01	40006067	40010924
S2-5	Os02g0255100	chr02	8760067	8766268
S3-5	Os03g0640400	chr03	24638186	24641449
	Os03g0640800	chr03	24651848	24657650	OSHB4|OsHox32,a class III homeodomain–leucine zipper (HD-Zip III) transcription factor
	Os03g0641300	chr03	24705008	24706533
	Os03g0641500	chr03	24721230	24723141
	Os03g0640100	chr03	24621460	24629502
S5-5	Os05g0553700	chr05	27530255	27533764
	Os05g0554000	chr05	27542126	27546073
	Os05g0552900	chr05	27504934	27509339
	Os05g0554400	chr05	27552789	27558220
	Os05g0553400	chr05	27524786	27526242
S8-12	Os08g0531600	chr08	26501167	26506198
	Os08g0531700	chr08	26507926	26512261
S9-9	Os09g0448500	chr09	16765919	16767767
	Os09g0449000	chr09	16785995	16788401
S10-7	Os10g0578800	chr10	23075402	23079074
	Os10g0579600	chr10	23114698	23117741
	Os10g0580400	chr10	23156882	23159586
S11-2	Os11g0203300	chr11	5223773	5225109
S11-11	Os11g0658700	chr11	26414362	26418426
S11-13	Os11g0660000	chr11	26488399	26492363
	Os11g0660500	chr11	26510873	26513127
S12-1	Os12g0183300	chr12	4216583	4217770

[truncated: 3 more sheets: Table S11, Table S12, Table S13]
